# Supplementary material for: Diagnostic accuracy of a three-gene Mycobacterium tuberculosis host response cartridge using fingerstick blood for childhood tuberculosis: a multicentre prospective study in low-income and middle-income countries
Source: PubMed Central journal article supplement (PMC10808504; doi:10.1016/s1473-3099(23)00491-7), 2024-02
Supplement: mmc1.pdf [file mmc1.pdf]

# THE LANCET

## Infectious Diseases

### Supplementary appendix

This appendix formed part of the original submission and has been peer reviewed. We post it as supplied by the authors.

Supplement to: Olbrich L, Verghese VP, Franckling-Smith Z, et al. Diagnostic accuracy of a three-gene *Mycobacterium tuberculosis* host response cartridge using fingerstick blood for childhood tuberculosis: a multicentre prospective study in low-income and middle-income countries. *Lancet Infect Dis* 2023; published online Oct 30. [https://doi.org/10.1016/S1473-3099\(23\)00491-7](https://doi.org/10.1016/S1473-3099(23)00491-7).

# Supplemental Material

*“Diagnostic accuracy of a three-gene Mycobacterium tuberculosis host response cartridge using fingerstick blood for childhood tuberculosis: a multicentre prospective study in low-income and middle-income countries”*

## Contents

|                                                                                                                                                                                                                                     |    |
|-------------------------------------------------------------------------------------------------------------------------------------------------------------------------------------------------------------------------------------|----|
| Supplemental methods.....                                                                                                                                                                                                           | 2  |
| <i>Supplemental Table 1: Inclusion and exclusion criteria for RaPaed-TB study.....</i>                                                                                                                                              | 2  |
| Supplemental Figure 1: Clinical case definitions and reference standards applied in RaPaed-TB.....                                                                                                                                  | 3  |
| <i>Additional definitions.....</i>                                                                                                                                                                                                  | 3  |
| Supplemental figures and tables .....                                                                                                                                                                                               | 4  |
| <i>Supplemental Figure 2: Assumption tested for one-way repeated ANOVA for MTB-HR TB score distribution over time.....</i>                                                                                                          | 4  |
| <i>Supplemental Figure 3: Difference in diagnostic accuracy of the MTB-HR TB score in prospective (A) and biobanked (B) by reference standard.....</i>                                                                              | 5  |
| <i>Supplemental Figure 4: MTB-HR Ct-distribution of all participants in participants classified by Strict Reference Standard (A), Microbiological Reference Standard (MRS) (B), and Composite Reference Standard (CRS) (C).....</i> | 6  |
| <i>Supplementary Table 2: Diagnostic accuracy of the MTB-HR TB score cut-off (1.5) for additional RaPaed-TB cohort subgroups against SRS.....</i>                                                                                   | 7  |
| <i>Supplemental Figure 5: MTB-HR TB score to estimated diagnostic accuracy of MTB-HR in subgroups of interest according to microbiological reference standard (A) and composite reference standard (B).....</i>                     | 8  |
| <i>Supplemental Table 3: Diagnostic accuracy of the MTB-HR TB score cut-off (1.5) for the RaPaed-TB cohort subgroups (age, HIV status, malnutrition, TB severity, TB disease location) against MRS.....</i>                         | 9  |
| <i>Supplemental Table 4: Diagnostic accuracy of the MTB-HR TB score cut-off (1.5) for the RaPaed-TB cohort subgroups (age, HIV status, malnutrition, TB severity, TB disease location) against CRS.....</i>                         | 10 |
| <i>Supplemental Figure 6: Summary ROC curve (SROC) for pooled random-effect meta-analysis accounting for site heterogeneity.....</i>                                                                                                | 11 |
| <i>Supplemental Figure 7: Distribution of MTB-HR TB scores by culture time to positivity and Ultra semi-quantitative result of reference specimen.....</i>                                                                          | 11 |
| <i>Supplemental Figure 8: Yield of strategy combining MTB-HR with one or more Ultra tests, among children positive in any respiratory sample (sputum or gastric lavage).....</i>                                                    | 12 |
| <i>Supplemental Figure 9: MTB-HR TB score over time in children with confirmed TB started on TB treatment (A) and children with unlikely TB (B).....</i>                                                                            | 12 |
| <i>Supplemental Table 6: MTB-HR as a treatment response marker: clinical characteristics of children who converted from TB positive (MTB-HR TB score &lt; 1.5) to non-TB (MTB-HR TB score ≥ 1.5) at each time point.....</i>        | 13 |

## Supplemental methods

### Supplemental Table 1: Inclusion and exclusion criteria for RaPaed-TB study <sup>1</sup>

Abbreviations: CNS = Central nervous system, CSF = Cerebrospinal fluid, IGRA = Interferon-gamma release assay, TST = Tuberculin skin test

| Inclusion criteria                                                                                                                                                                                                                                                                                                                                                                                                                                                                                                                                                                                                                                                                                                                                                                                                                                                                                                                                                                                                                                                                                                                                                                                                                                                                                                                                                                                                                                                                                                                                                                                                                                                                                                                                                                                                                                                                                                                                                                                                                                                                                                                                                                                                                                                                                                                                                                                                                                                                                                                                                                                                            | Exclusion criteria                                                                                                                                                                                                                                                                                                                                                                                                                                                                                                                                                                              |
|-------------------------------------------------------------------------------------------------------------------------------------------------------------------------------------------------------------------------------------------------------------------------------------------------------------------------------------------------------------------------------------------------------------------------------------------------------------------------------------------------------------------------------------------------------------------------------------------------------------------------------------------------------------------------------------------------------------------------------------------------------------------------------------------------------------------------------------------------------------------------------------------------------------------------------------------------------------------------------------------------------------------------------------------------------------------------------------------------------------------------------------------------------------------------------------------------------------------------------------------------------------------------------------------------------------------------------------------------------------------------------------------------------------------------------------------------------------------------------------------------------------------------------------------------------------------------------------------------------------------------------------------------------------------------------------------------------------------------------------------------------------------------------------------------------------------------------------------------------------------------------------------------------------------------------------------------------------------------------------------------------------------------------------------------------------------------------------------------------------------------------------------------------------------------------------------------------------------------------------------------------------------------------------------------------------------------------------------------------------------------------------------------------------------------------------------------------------------------------------------------------------------------------------------------------------------------------------------------------------------------------|-------------------------------------------------------------------------------------------------------------------------------------------------------------------------------------------------------------------------------------------------------------------------------------------------------------------------------------------------------------------------------------------------------------------------------------------------------------------------------------------------------------------------------------------------------------------------------------------------|
| <p>1) <b>Consent and Assent (if applicable):</b> signed written consent/assent, or witnessed oral consent/assent in the case of illiteracy, before undertaking any study-specific activity.</p> <p><b>Of the following, either criterion 2), OR criterion 3), or both, has to be met:</b></p> <p>2) <b>Confirmation of TB disease:</b> microbiological confirmation of TB disease by positive smear AND/OR culture AND/OR PCR (e.g., Xpert MTB/RIF®); e.g. in a non-study health facility</p> <p><b>AND/OR</b></p> <p>3) <b>Signs and Symptoms:</b> suspicion of TB disease (one or more criteria):</p> <ol style="list-style-type: none"> <li>Chest X-Ray suggestive of TB: <u>cavity</u> AND/OR <u>hilar/mediastinal lymph node</u> enlarged AND/OR miliary pattern</li> <li>Weight loss** or failure to thrive within the previous 3 months that, in the investigator's opinion, is not solely due to inadequate feeding; or to another non-TB cause.</li> <li>Any cough combined with: <ul style="list-style-type: none"> <li>Loss of weight**;</li> <li>Evidence of <i>Mycobacterium tuberculosis</i> infection: TST AND/OR IGRA positive</li> </ul> </li> <li>Cough alone: persistent unremitting cough duration of ≥ 14 days</li> <li>Repeated episodes of fever within 14 days not responding to course of antibiotics AND positive TST or IGRA, (for malaria endemic areas: AND after malaria has been excluded by at least a negative rapid test)</li> <li>Signs &amp; symptoms of extrapulmonary TB: <ul style="list-style-type: none"> <li>Unilateral non-painful lymph node(s) visibly enlarged ≥ 1 month;</li> <li>Gibbus (especially of recent onset)</li> <li>Non-painful enlarged joint</li> <li>Pleural effusion</li> <li>Pericardial effusion</li> </ul> </li> <li>CSF examination findings in line with TB meningitis with at least elevated protein and low glucose (in relation to serum glucose); OR signs and symptoms in line with TB meningitis/CNS TB if lumbar puncture is contraindicated, in the view of the investigator at least one of the following two: <ul style="list-style-type: none"> <li>palsy of oculomotoric nerves of recent onset</li> <li>focal neurological symptoms indicating elevated intracranial pressure OR CNS lesions, of recent onset</li> </ul> </li> </ol> <p>AND/OR at least two of the following less-specific signs of TB meningitis/CNS TB (for malaria endemic areas: AND a negative malaria rapid diagnostic test*):</p> <ul style="list-style-type: none"> <li>Lethargy</li> <li>Convulsion</li> <li>Meningism (neck stiffness)</li> <li>Headache</li> </ul> | <ol style="list-style-type: none"> <li>Critical condition (if study procedures seem like an undue risk to the participant's life), such as hypovolemic shock or clinically relevant anaemia (tachypnoea, tachycardia)</li> <li>Body weight less than 2 kg</li> <li>Children of 15 years of age or more</li> <li>Are currently receiving anti-TB drug(s): ideally, eligible participants should not have received any anti-TB treatment.</li> <li>In exceptions, up to three daily doses given since treatment start before first study blood draw are acceptable for study inclusion</li> </ol> |

**Clinical case definitions**

| Confirmed TB                                                                                    | Unconfirmed TB                                                                                                                                                                                                                                                                                                                                                                  | Unlikely TB                                                                                                                                                                                                                                                                                                                                    |
|-------------------------------------------------------------------------------------------------|---------------------------------------------------------------------------------------------------------------------------------------------------------------------------------------------------------------------------------------------------------------------------------------------------------------------------------------------------------------------------------|------------------------------------------------------------------------------------------------------------------------------------------------------------------------------------------------------------------------------------------------------------------------------------------------------------------------------------------------|
| Bacteriological confirmation obtained (MTB confirmed in at least 1 reference standard specimen) | Bacteriological confirmation NOT obtained AND Symptoms/signs suggestive of TB ( <i>recruitment criterion</i> ) AND Bacteriological investigations negative for MTB with at least 1 sample with a valid negative result AND Local investigator's opinion (i.e., child believed to have unconfirmed TB) AND Positive response to TB treatment (i.e., no symptoms at end of study) | Bacteriological investigations negative for MTB with at least 1 sample with a valid negative result AND Local investigator's opinion (i.e., child believed to have unlikely TB) AND Symptom resolution without TB treatment (i.e., no symptoms at end of study at month 3) AND No TB treatment received (preventive of empirical TB treatment) |

**Reference standards**

|                                                     |                                                       |                             |
|-----------------------------------------------------|-------------------------------------------------------|-----------------------------|
| <i>Strict Reference Standard</i>                    | <b>SRS-positive (n=127)</b><br>(culture only)         | <b>SRS-negative (n=207)</b> |
| <i>Composite Microbiological Reference Standard</i> | <b>MRS-positive (n=202)</b><br>(culture and/or Ultra) | <b>MRS-negative (n=207)</b> |
| <i>Composite Clinical Reference Standard</i>        | <b>CRS-positive (n=432)</b>                           | <b>CRS-negative (n=207)</b> |

**Supplemental Figure 1: Clinical case definitions and reference standards applied in RaPaed-TB**

Abbreviations: SRS = Strict Reference Standard , MRS = Composite Microbiological Reference Standard , CRS = Composite Clinical Reference Standard

**Additional definitions**

**Severe/Non-severe TB disease:** Definition of non-severe TB disease followed WHO guidelines, being: CXR findings in line with non-severe TB disease (intrathoracic lymph node TB without significant airway obstruction; PTB confined to one lobe with no cavities and no miliary pattern; or uncomplicated pleural effusion); Ultra negative, "Trace", "Very low" or "Low"; sputum smear negative (if Xpert MTB/RIF or Ultra not available); mild TB symptoms that do not require hospitalization or lethargy. Children living with HIV, with severe acute malnutrition, or under the age of 3 months were excluded.<sup>16</sup>

## Supplemental figures and tables

**A**

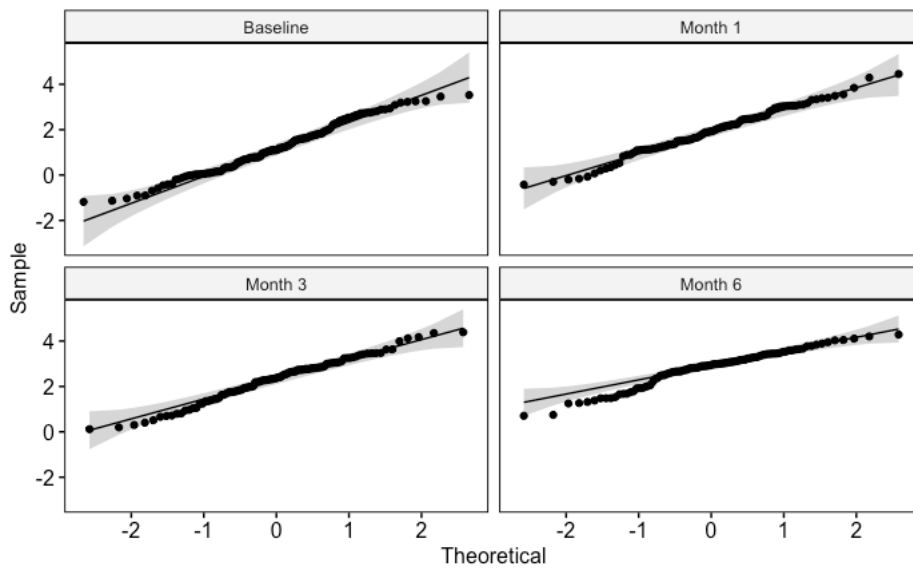

**B**

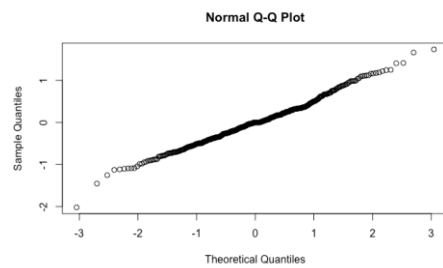

**C**

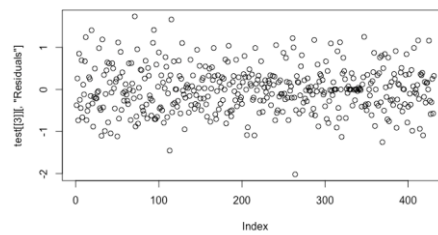

### **Supplemental Figure 2: Assumption tested for one-way repeated ANOVA for MTB-HR TB score distribution over time.**

**A.** Assumption of normality tested by the Shapiro Wilk test and by plotting residuals. **B and C,** assumptions of homoscedasticity tested by plotting the residuals against the predicted values.

The MTB-HR TB score was measured at baseline, month 1, month 3, and at month 6 if the child was on treatment or had persisting symptoms.

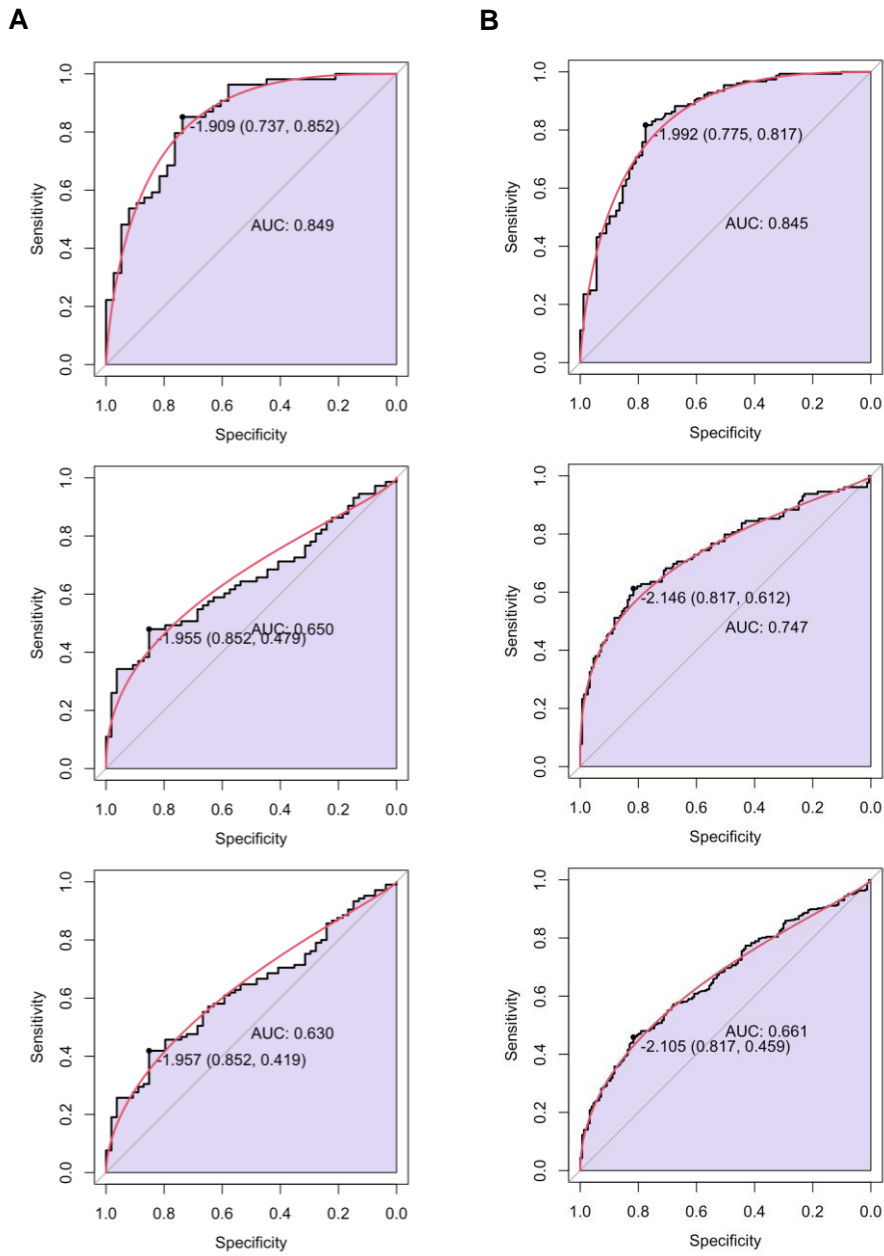

**Supplemental Figure 3: Difference in diagnostic accuracy of the MTB-HR TB score in prospective (A) and biobanked (B) by reference standard.**

Top. SRS. Middle. MRS. Bottom. CRS

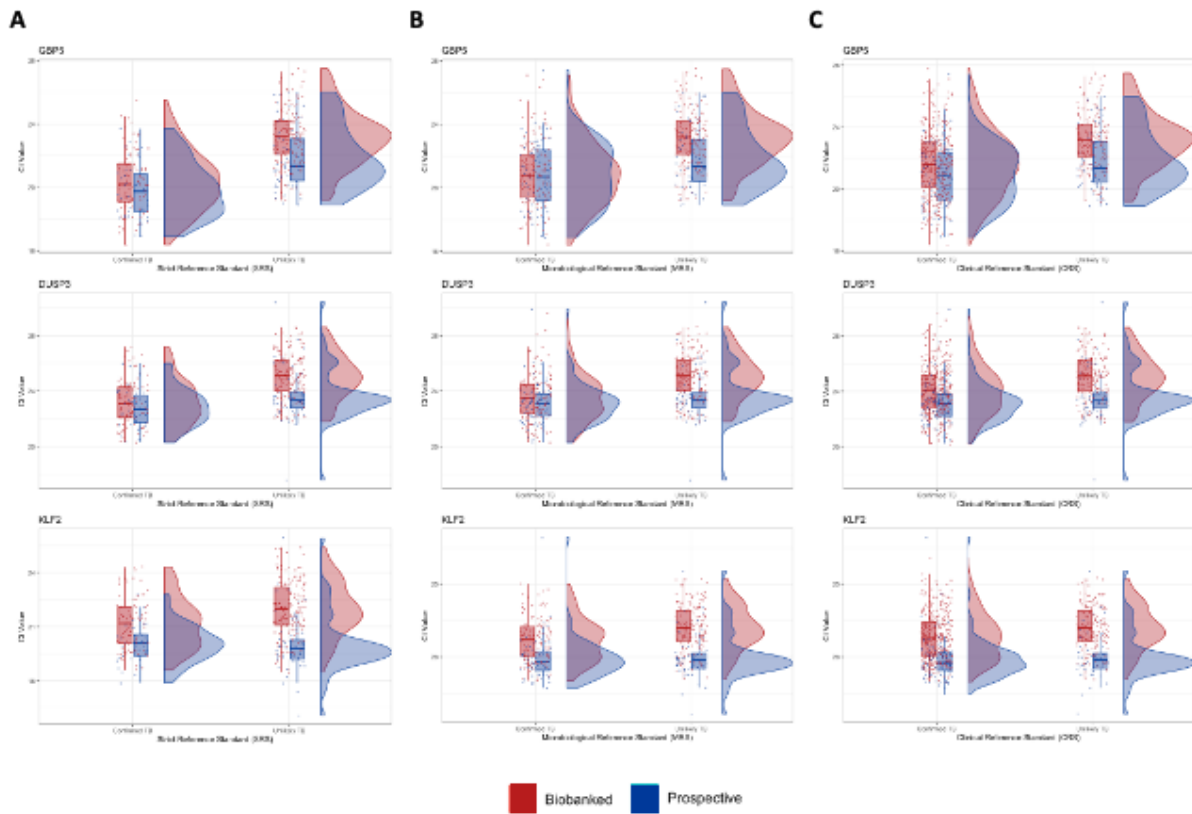

**Supplemental Figure 4: MTB-HR Ct-distribution of all participants in participants classified by Strict Reference Standard (A), Microbiological Reference Standard (MRS) (B), and Composite Reference Standard (CRS) (C).**

**A. SRS. B. MRS. C. CRS**

Raincloud plots show the distribution of the Ct values for the GBP5 (top), DUSP3 (middle), and KLF2 (bottom) gene transcripts, the bars indicate the 10-90% percentile, and the box the interquartile range (IQR). The points are individual data points and show the spread. The data is displayed stratified by whether the sample was prospective (blue) or biobanked (red) (before re-centring).

**Supplementary Table 2: Diagnostic accuracy of the MTB-HR TB score cut-off (1.5) for additional RaPaed-TB cohort subgroups against SRS.**

The sample size by subgroup is provided (All), number of true positives (TP), false positives (FP), false negatives (FN), and true negatives (TN), along with the sensitivity, specificity, and area under the curve (AUC) with their respective 95% confidence intervals (CIs).

\* Denotes missingness

\*\*Sample size was too small to conduct this analysis (< 50, n=4) and (50 - < 200, n=9). Neither had positive results.

| Subgroups                      | All | TP | FP | FN | TN  | Sensitivity % (95% CI) | Specificity % (95% CI) |
|--------------------------------|-----|----|----|----|-----|------------------------|------------------------|
| Overall                        | 334 | 76 | 20 | 51 | 187 | 59.8 (50.8 – 68.4)     | 90.3 (85.5 – 94.0)     |
| Sex                            |     |    |    |    |     |                        |                        |
| Male                           | 159 | 33 | 8  | 28 | 90  | 54.1 (40.8 – 66.9)     | 91.8 (84.5 – 96.4)     |
| Female                         | 175 | 43 | 12 | 23 | 97  | 65.2 (52.4 – 76.5)     | 89.0 (81.6 – 94.2)     |
| BCG vaccination*               |     |    |    |    |     |                        |                        |
| Not vaccinated                 | 19  | 8  | 1  | 7  | 3   | 53.3 (26.6 – 78.7)     | 75.0 (19.4 – 99.4)     |
| Vaccinated                     | 290 | 56 | 18 | 41 | 175 | 57.7 (47.3 – 67.6)     | 90.7 (85.7 – 94.4)     |
| TB contact in the last months* |     |    |    |    |     |                        |                        |
| No                             | 143 | 37 | 8  | 28 | 70  | 56.9 (44.0 – 69.2)     | 89.7 (80.8 – 95.5)     |
| Yes                            | 179 | 37 | 9  | 23 | 110 | 61.7 (48.2 – 73.9)     | 92.4 (86.1 – 96.5)     |
| Child ever diagnosed with TB*  |     |    |    |    |     |                        |                        |
| No                             | 323 | 72 | 20 | 50 | 181 | 59.0 (49.7 – 67.8)     | 90.0 (85.1 – 93.8)     |
| Yes                            | 8   | 4  | 0  | 1  | 3   | 80.0 (28.4 – 99.5)     | 100.0 (29.2 – 100.0)   |
| Final TST/Mantoux results*     |     |    |    |    |     |                        |                        |
| Negative                       | 140 | 14 | 7  | 15 | 104 | 48.3 (29.4 – 67.5)     | 93.7 (87.4 – 97.4)     |
| Positive                       | 164 | 50 | 10 | 33 | 71  | 60.2 (48.9 – 70.8)     | 87.7 (78.5 – 93.9)     |
| Hospitalised at enrolment      |     |    |    |    |     |                        |                        |
| No                             | 226 | 34 | 14 | 29 | 149 | 54.0 (40.9 – 66.6)     | 91.4 (86.0 – 95.2)     |
| Yes                            | 108 | 42 | 6  | 22 | 38  | 65.6 (52.7 – 77.1)     | 86.4 (72.6 – 94.8)     |
| Baseline CD4 count             |     |    |    |    |     |                        |                        |
| < 50**                         | -   | -  | -  | -  | -   |                        |                        |
| 50 - < 200**                   | -   | -  | -  | -  | -   |                        |                        |
| 200 - < 500                    | 8   | 3  | 2  | 0  | 3   | 100.0 (29.2 – 100.0)   | 60.0 (14.7 – 94.7)     |
| ≥ 500                          | 9   | 1  | 0  | 1  | 7   | 50.0 (1.26 – 98.7)     | 100.0 (59.0 – 100.0)   |
| CXR findings*                  |     |    |    |    |     |                        |                        |
| Normal                         | 132 | 7  | 8  | 20 | 97  | 25.9 (11.1 – 46.3)     | 92.4 (85.5 – 96.7)     |
| Abnormal – likely TB           | 103 | 53 | 6  | 21 | 23  | 71.6 (59.9 – 81.5)     | 79.3 (60.3 – 92.0)     |
| Abnormal equivocal             | 62  | 12 | 5  | 6  | 39  | 66.7 (41.0 – 86.7)     | 88.6 (75.4 – 96.2)     |



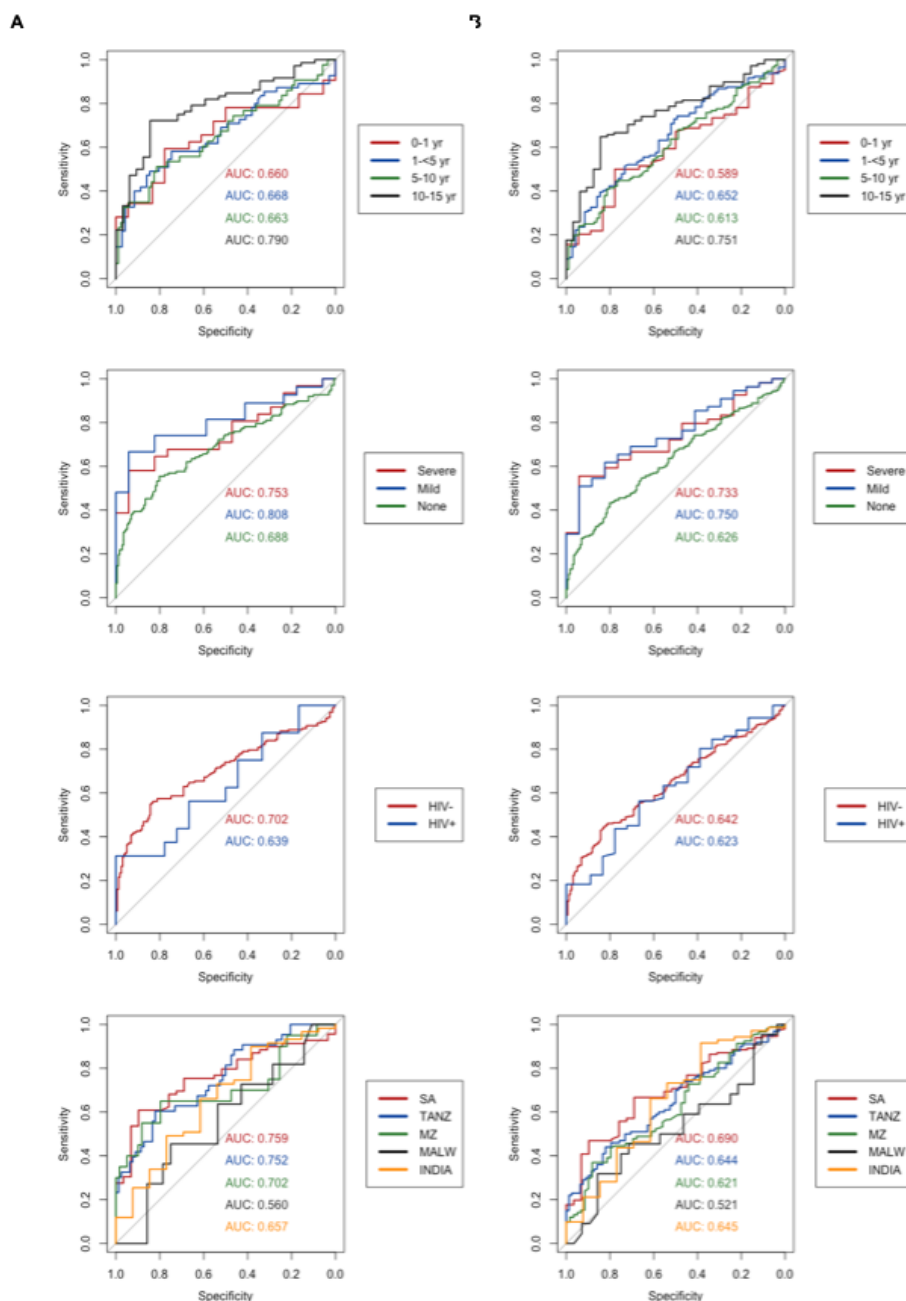

**Supplemental Figure 5: MTB-HR TB score to estimated diagnostic accuracy of MTB-HR in subgroups of interest according to microbiological reference standard (A) and composite reference standard (B).**

Abbreviations. SA: South Africa, TANZ: Tanzania, MZ: Mozambique, MALW: Malawi

**A:** Age (n=409, n (< 1 year) = 50, n (1-5 years) = 126, n (5-10 years) = 129, n (> 10 years) = 104, DeLong test between Age < 1 and Age 1-5 years: p = 0.932, Age < 1 and Age 5-10 years: p = 0.975, Age < 1 and Age > 10 years: p = 0.151; HIV (N=402, n (negative) = 368, n (positive) = 34, DeLong test between HIV negative and HIV positive: p = 0.542; Malnutrition (N=409, n (none) = 317, n (mild/moderate) = 44, n (severe) = 48, DeLong test between no malnutrition and severe acute malnutrition: p = 0.394 and between no malnutrition and mild/moderate malnutrition: p = 0.566; Site (N=409, n (South Africa) = 98, n (Tanzania) = 121, n (Mozambique) = 79, n (Malawi) = 39, n (India) = 72, DeLong test between South Africa and Tanzania: p = 0.909, South Africa and Mozambique: p = 0.540, South Africa and Malawi: p = 0.089, South Africa and India: p = 0.312.

**B:** Age (n=639, n (< 1 year) = 82, n (1-5 years) = 215, n (5-10 years) = 202, n (> 10 years) = 140, DeLong test between Age < 1 and Age 1-5 years: p = 0.435, Age < 1 and Age 5-10 years: p = 0.770, Age < 1 and Age > 10 years: p = 0.055; HIV (N=630, n (negative) = 541, n (positive) = 89, DeLong test between HIV negative and HIV positive: p = 0.801; Malnutrition (N=639, n (none) = 496, n (mild/moderate) = 72, n (severe) = 71, DeLong test between no malnutrition and severe acute malnutrition: p = 0.112 and between no malnutrition and mild/moderate malnutrition: p = 0.849; Site (N=639, n (South Africa) = 176, n (Tanzania) = 178, n (Mozambique) = 151, n (Malawi) = 50, n (India) = 84, DeLong test between South Africa and Tanzania: p = 0.462, South Africa and Mozambique: p = 0.297, South Africa and Malawi: p = 0.090, South Africa and India: p = 0.659.

**Supplemental Table 3: Diagnostic accuracy of the MTB-HR TB score cut-off (1.5) for the RaPaed-TB cohort subgroups (age, HIV status, malnutrition, TB severity, TB disease location) against MRS.**

The sample size by subgroup is provided (All), number of true positives (TP), false positives (FP), false negatives (FN), and true negatives (TN), along with the sensitivity and specificity with their respective 95% confidence intervals (CIs).

\* Denotes missingness

\*\* TB disease severity and location imply that the child already has tuberculosis, hence calculating a specificity was not possible

\*\*\* The sample size for CD4 category (< 50) was too small and there were no positives.

| Subgroups                  | All | TP | FP | FN  | TN  | Sensitivity % (95% CI) | Specificity % (95% CI) |
|----------------------------|-----|----|----|-----|-----|------------------------|------------------------|
| Overall                    | 409 | 84 | 20 | 118 | 187 | 41.6 (34.7 – 48.7)     | 90.3 (85.5 – 94.0)     |
| Age                        |     |    |    |     |     |                        |                        |
| < 1                        | 50  | 9  | 1  | 23  | 17  | 28.1 (13.7 – 46.7)     | 94.4 (72.7 – 99.9)     |
| 1 - 5                      | 126 | 20 | 6  | 35  | 65  | 36.4 (23.8 – 50.4)     | 91.5 (82.5 – 96.8)     |
| 5 – 10                     | 129 | 15 | 9  | 28  | 77  | 34.9 (21.0 – 50.9)     | 89.5 (81.1 – 95.1)     |
| > 10                       | 104 | 40 | 4  | 32  | 28  | 55.6 (43.4 – 67.3)     | 87.5 (71.0 – 96.5)     |
| HIV status                 |     |    |    |     |     |                        |                        |
| Negative                   | 368 | 79 | 17 | 105 | 167 | 42.9 (35.7 – 50.4)     | 90.8 (85.6 – 94.5)     |
| Positive                   | 34  | 5  | 2  | 11  | 16  | 31.3 (11.0 – 58.7)     | 88.9 (65.3 – 98.6)     |
| Malnutrition               |     |    |    |     |     |                        |                        |
| None                       | 317 | 55 | 18 | 89  | 155 | 38.2 (30.2 – 46.7)     | 89.6 (84.1 – 93.7)     |
| Mild/moderate              | 44  | 16 | 1  | 11  | 16  | 59.3 (38.8 – 77.6)     | 94.1 (71.3 – 99.9)     |
| Severe                     | 48  | 13 | 1  | 18  | 16  | 41.9 (24.5 – 60.9)     | 94.1 (71.3 – 99.9)     |
| Site                       |     |    |    |     |     |                        |                        |
| South Africa               | 98  | 38 | 3  | 31  | 26  | 55.1 (42.6 – 67.1)     | 89.7 (72.6 – 97.8)     |
| Tanzania                   | 121 | 17 | 6  | 26  | 72  | 39.5 (25.0 – 55.6)     | 92.3 (84.0 – 97.1)     |
| Mozambique                 | 79  | 8  | 5  | 12  | 54  | 40.0 (19.1 – 63.9)     | 91.5 (81.3 – 97.2)     |
| Malawi                     | 39  | 1  | 4  | 10  | 24  | 9.1 (0.2 – 41.3)       | 85.7 (67.3 – 96.0)     |
| India                      | 72  | 20 | 2  | 39  | 11  | 33.9 (22.1 – 47.4)     | 84.6 (54.6 – 98.1)     |
| TB severity**              |     |    |    |     |     |                        |                        |
| Non severe                 | 41  | 13 | -  | 28  | -   | 31.7 (18.1 – 48.1)     | -                      |
| Severe                     | 155 | 70 | -  | 85  | -   | 45.2 (37.2 – 53.3)     | -                      |
| TB location**              |     |    |    |     |     |                        |                        |
| PTB                        | 111 | 42 | -  | 69  | -   | 37.8 (28.8 – 47.5)     | -                      |
| EPTB                       | 39  | 10 | -  | 29  | -   | 25.6 (13.0 – 42.1)     | -                      |
| PTB + EPTB                 | 46  | 31 | -  | 15  | -   | 67.4 (52.0 – 80.5)     | -                      |
| Lymph node TB              | 28  | 15 | -  | 13  | -   | 53.6 (33.9 – 72.5)     | -                      |
| TB meningitis              | 20  | 12 | -  | 8   | -   | 60.0 (36.1 – 80.9)     | -                      |
| Sex                        |     |    |    |     |     |                        |                        |
| Male                       | 204 | 37 | 8  | 69  | 90  | 34.9 (25.9 – 44.8)     | 91.8 (84.5 – 96.4)     |
| Female                     | 205 | 47 | 12 | 49  | 97  | 49.0 (38.6 – 59.4)     | 89.0 (81.6 – 94.2)     |
| BCG vaccination            |     |    |    |     |     |                        |                        |
| Not vaccinated             | 19  | 8  | 1  | 7   | 3   | 53.3 (26.6 – 78.7)     | 75.0 (19.4 – 99.4)     |
| Vaccinated                 | 359 | 62 | 18 | 104 | 175 | 37.3 (30.0 – 45.2)     | 90.7 (85.7 – 94.4)     |
| TB contact in last months  |     |    |    |     |     |                        |                        |
| No                         | 191 | 42 | 8  | 71  | 70  | 37.2 (28.3 – 46.8)     | 89.7 (80.8 – 95.5)     |
| Yes                        | 205 | 40 | 9  | 46  | 110 | 46.5 (35.7 – 57.6)     | 92.4 (86.1 – 96.5)     |
| Child ever diagnosed w/ TB |     |    |    |     |     |                        |                        |
| No                         | 396 | 79 | 20 | 116 | 181 | 40.5 (33.6 – 47.8)     | 90.0 (85.1 – 93.8)     |
| Yes                        | 10  | 5  | 0  | 2   | 3   | 71.4 (29.0 – 96.3)     | 100.0 (29.2 – 100.0)   |
| Final TST/Mantoux results  |     |    |    |     |     |                        |                        |
| Negative                   | 180 | 16 | 7  | 53  | 104 | 23.2 (13.9 – 34.9)     | 93.7 (87.4 – 97.4)     |
| Positive                   | 194 | 56 | 10 | 57  | 71  | 49.6 (40.0 – 59.1)     | 87.7 (78.5 – 93.9)     |
| Hospitalised at enrolment  |     |    |    |     |     |                        |                        |
| No                         | 260 | 38 | 14 | 59  | 149 | 39.2 (29.4 – 49.6)     | 91.4 (86.0 – 95.2)     |
| Yes                        | 149 | 46 | 6  | 59  | 38  | 43.8 (34.1 – 53.8)     | 86.4 (72.6 – 94.8)     |
| Baseline CD4 count         |     |    |    |     |     |                        |                        |
| < 50***                    | -   | -  | -  | -   | -   |                        |                        |
| 50 - < 200                 | 4   | 1  | 0  | 1   | 2   | 50.0 (1.3 – 98.7)      | 100.0 (15.8 – 100.0)   |
| 200 - < 500                | 11  | 3  | 2  | 3   | 3   | 50.0 (11.8 – 88.2)     | 60.0 (14.7 – 94.7)     |
| ≥ 500                      | 11  | 1  | 0  | 3   | 7   | 25.0 (0.6 – 80.6)      | 100.0 (59.0 – 100.0)   |
| CXR findings               |     |    |    |     |     |                        |                        |
| Normal                     | 126 | 12 | 10 | 37  | 67  | 24.5 (13.3 – 38.9)     | 87.0 (77.4 – 93.6)     |
| Abnormal, likely TB        | 207 | 66 | 8  | 63  | 70  | 51.2 (42.2 – 60.1)     | 89.7 (80.8 – 95.5)     |
| Abnormal equivocal         | 50  | 4  | 2  | 13  | 31  | 23.5 (6.8 – 49.9)      | 93.9 (79.8 – 99.3)     |

**Supplemental Table 4: Diagnostic accuracy of the MTB-HR TB score cut-off (1.5) for the RaPaed-TB cohort subgroups (age, HIV status, malnutrition, TB severity, TB disease location) against CRS.**

The sample size by subgroup is provided (All), number of true positives (TP), false positives (FP), false negatives (FN), and true negatives (TN), along with the sensitivity and specificity with their respective 95% confidence intervals (Cis).

\* Denotes missingness

\*\* TB disease severity and location imply that the child already has tuberculosis, hence calculating a specificity was not possible

\*\*\* The sample size for CD4 category (< 50) was too small and there were no positives.

| Subgroups                  | All | TP  | FP | FN  | TN  | Sensitivity % (95% CI) | Specificity % (95% CI) |
|----------------------------|-----|-----|----|-----|-----|------------------------|------------------------|
| Overall                    | 639 | 128 | 20 | 304 | 187 | 29.6 (25.4 – 34.2)     | 90.3 (85.5 – 94.0)     |
| Age                        |     |     |    |     |     |                        |                        |
| < 1                        | 82  | 10  | 1  | 54  | 17  | 15.6 (7.8 – 26.9)      | 94.4 (72.7 – 99.9)     |
| 1 - 5                      | 215 | 37  | 6  | 107 | 65  | 25.7 (18.8 – 33.6)     | 91.5 (82.5 – 96.8)     |
| 5 – 10                     | 202 | 29  | 9  | 87  | 77  | 25.0 (17.4 – 33.9)     | 89.5 (81.1 – 95.1)     |
| > 10                       | 140 | 52  | 4  | 56  | 28  | 48.1 (38.4 – 58.0)     | 87.5 (71.0 – 96.5)     |
| HIV status                 |     |     |    |     |     |                        |                        |
| Negative                   | 541 | 115 | 17 | 242 | 167 | 32.2 (27.4 – 37.3)     | 90.8 (85.6 – 94.5)     |
| Positive                   | 89  | 13  | 2  | 58  | 16  | 18.3 (10.1 – 29.3)     | 88.9 (65.3 – 98.6)     |
| Malnutrition               |     |     |    |     |     |                        |                        |
| None                       | 496 | 89  | 18 | 234 | 155 | 27.6 (22.8 – 32.8)     | 89.6 (84.1 – 93.7)     |
| Mild/moderate              | 72  | 21  | 1  | 34  | 16  | 38.2 (25.4 – 52.3)     | 94.1 (71.3 – 99.9)     |
| Severe                     | 71  | 18  | 1  | 36  | 16  | 33.3 (21.1 – 47.5)     | 94.1 (71.3 – 99.9)     |
| Site                       |     |     |    |     |     |                        |                        |
| South Africa               | 176 | 63  | 3  | 84  | 26  | 42.9 (34.7 – 51.3)     | 89.7 (72.6 – 97.8)     |
| Tanzania                   | 178 | 28  | 6  | 72  | 72  | 28.0 (19.5 – 37.9)     | 92.3 (84.0 – 97.1)     |
| Mozambique                 | 151 | 14  | 5  | 78  | 54  | 15.2 (8.6 – 24.2)      | 91.5 (81.3 – 97.2)     |
| Malawi                     | 50  | 3   | 4  | 19  | 24  | 13.6 (2.9 – 34.9)      | 85.7 (67.3 – 96.0)     |
| India                      | 84  | 20  | 2  | 51  | 11  | 28.2 (18.1 – 40.1)     | 84.6 (54.6 – 98.1)     |
| TB severity**              |     |     |    |     |     |                        |                        |
| Non severe                 | 126 | 26  | -  | 100 | -   | 20.6 (13.9 – 28.8)     | -                      |
| Severe                     | 292 | 101 | -  | 191 | -   | 34.6 (29.1 – 40.4)     | -                      |
| TB location**              |     |     |    |     |     |                        |                        |
| PTB                        | 285 | 67  | -  | 218 | -   | 23.5 (18.7 – 28.9)     | -                      |
| EPTB                       | 59  | 15  | -  | 44  | -   | 25.4 (15.0 – 38.4)     | -                      |
| PTB + EPTB                 | 74  | 45  | -  | 29  | -   | 60.8 (48.8 – 72.0)     | -                      |
| Lymph node TB              | 46  | 19  | -  | 27  | -   | 41.3 (27.0 – 56.8)     | -                      |
| TB meningitis              | 25  | 13  | -  | 12  | -   | 52.0 (31.3 – 72.2)     | -                      |
| Sex                        |     |     |    |     |     |                        |                        |
| Male                       | 333 | 61  | 8  | 174 | 90  | 26.0 (20.5 – 32.1)     | 91.8 (84.5 – 96.4)     |
| Female                     | 306 | 67  | 12 | 130 | 97  | 34.0 (27.4 – 41.1)     | 89.0 (81.6 – 94.2)     |
| BCG vaccination            |     |     |    |     |     |                        |                        |
| Not vaccinated             | 25  | 9   | 1  | 12  | 3   | 42.9 (21.8 – 66.0)     | 75.0 (19.4 – 99.4)     |
| Vaccinated                 | 549 | 98  | 18 | 258 | 175 | 27.5 (23.0 – 32.5)     | 90.7 (85.7 – 94.4)     |
| TB contact in last months  |     |     |    |     |     |                        |                        |
| No                         | 295 | 64  | 8  | 153 | 70  | 29.5 (23.5 – 36.0)     | 89.7 (80.8 – 95.5)     |
| Yes                        | 322 | 59  | 9  | 144 | 110 | 29.1 (22.9 – 35.8)     | 92.4 (86.1 – 96.5)     |
| Child ever diagnosed w/ TB |     |     |    |     |     |                        |                        |
| No                         | 614 | 123 | 20 | 290 | 181 | 29.8 (25.4 – 34.4)     | 90.0 (85.1 – 93.8)     |
| Yes                        | 22  | 5   | 0  | 14  | 3   | 26.3 (9.2 – 51.2)      | 100.0 (29.2 – 100.0)   |
| Final TST/Mantoux results  |     |     |    |     |     |                        |                        |
| Negative                   | 274 | 25  | 7  | 138 | 104 | 15.3 (10.2 – 21.8)     | 93.7 (87.4 – 97.4)     |
| Positive                   | 299 | 83  | 10 | 135 | 71  | 38.1 (31.6 – 44.9)     | 87.7 (78.5 – 93.9)     |
| Hospitalised at enrolment  |     |     |    |     |     |                        |                        |
| No                         | 414 | 60  | 14 | 191 | 149 | 23.9 (18.8 – 29.7)     | 91.4 (86.0 – 95.2)     |
| Yes                        | 225 | 68  | 6  | 113 | 38  | 37.6 (30.5 – 45.1)     | 86.4 (72.6 – 94.8)     |
| Baseline CD4 count         |     |     |    |     |     |                        |                        |
| < 50***                    | -   | -   | -  | -   | -   |                        |                        |
| 50 - < 200                 | 9   | 3   | 0  | 4   | 2   | 42.9 (9.9 – 81.6)      | 100.0 (15.8 – 100.0)   |
| 200 - < 500                | 30  | 8   | 2  | 17  | 3   | 32.0 (14.9 – 53.5)     | 60.0 (14.7 – 94.7)     |
| ≥ 500                      | 32  | 1   | 0  | 24  | 7   | 4.0 (0.1 – 20.4)       | 100.0 (59.0 – 100.0)   |
| CXR findings               |     |     |    |     |     |                        |                        |
| Normal                     | 188 | 22  | 10 | 89  | 67  | 19.8 (12.9 – 28.5)     | 87.0 (77.4 – 93.6)     |
| Abnormal, likely TB        | 337 | 97  | 8  | 162 | 70  | 37.5 (31.5 – 42.7)     | 89.7 (80.8 – 95.5)     |
| Abnormal equivocal         | 68  | 5   | 2  | 30  | 31  | 14.3 (4.8 – 30.3)      | 93.9 (79.8 – 99.3)     |

**SROC curve (bivariate model) for site-stratified accuracy estimates**

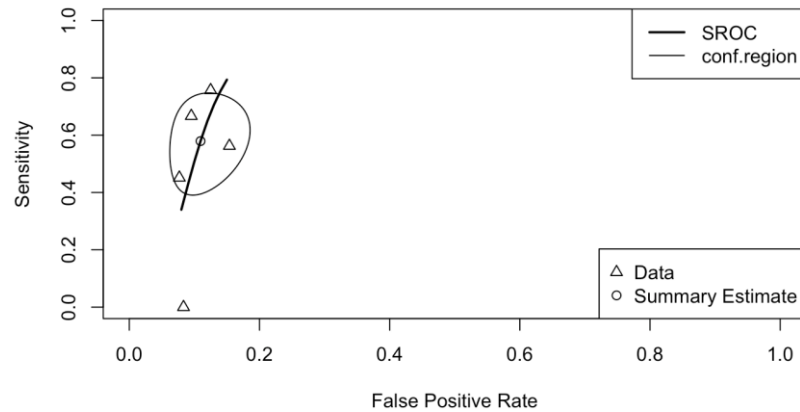

**Supplemental Figure 6: Summary ROC curve (SROC) for pooled random-effect meta-analysis accounting for site heterogeneity**

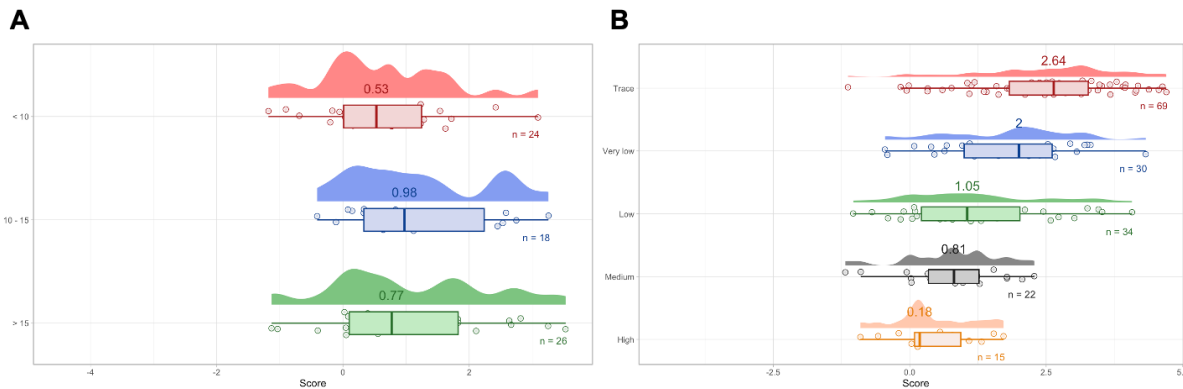

**Supplemental Figure 7: Distribution of MTB-HR TB scores by culture time to positivity and Ultra semi-quantitative result of reference specimen.**

**A.** Distribution of MTB-HR TB score across groups of MGIT time to positivity (< 10 days, 10-15 days, and > 15 days) among those that had a positive culture. Raincloud plots show the distribution, and the bars indicate the 10-90% percentile, the box the interquartile range (IQR). The points are individual data points and show the spread. **B.** Distribution of MTB-HR TB score by Ultra semi-quantitative result of sputum sample (spontaneous or induced). Of 171 children with microbiologically confirmed TB, 84 (48.9%) were confirmed by both Ultra and TB culture, 62 (36.0%) by Ultra only, and 26 (15.1%) by TB culture only. For those 84 children confirmed by both Ultra and TB culture, the semi-quantitative Ultra readout “Trace” was observed in 12 (14.3%), “Very low” in 16 (19.1%), “Low” in 27 (32.1%), “Medium” in 16 (19.0%), and “High” in 12 (14.3%), with one semi-quantitative readout missing. In contrast, observed strength of signal in 62 children confirmed by Ultra alone was lower - mostly “Trace” in 46 (74.2%), “Very low” in 8 (12.9%), “Low” in 6 (9.7%), and “Medium” in 2 (3.2%). Notably, of those 62 children only confirmed by “Trace”, 60 (96.8%) were only confirmed by one single “Trace” call. Raincloud plots show the distribution, and the bars indicate the 10-90% percentile, the box the interquartile range (IQR). The points are individual data points and show the spread.

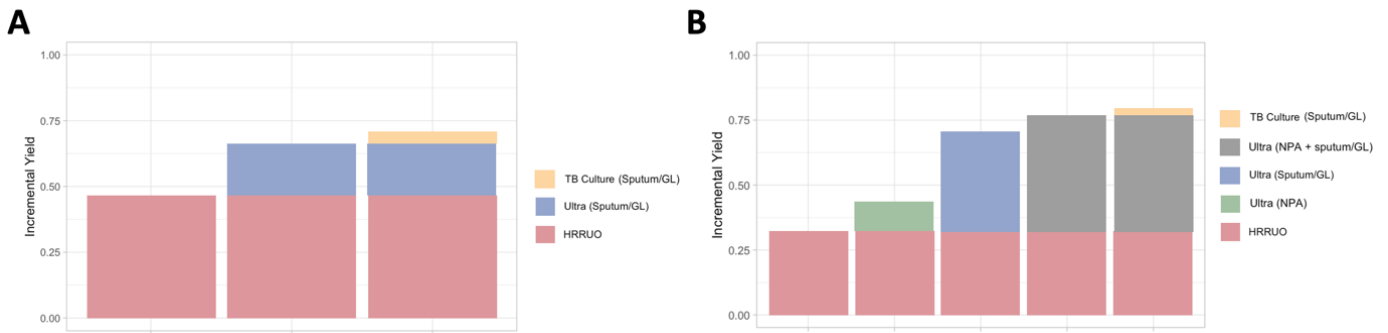

**Supplemental Figure 8: Yield of strategy combining MTB-HR with one or more Ultra tests, among children positive in any respiratory sample (sputum or gastric lavage).**

**A.** Children 5-14 years: incremental yield of adding one sputum Ultra, and a subsequent sputum culture (n=109). In older children 5-14 years, 50/109 (45.9%) were identified by a positive MTB-HR, with an additional 20/109 (18.3%) testing positive on sputum/GL Ultra. TB culture identified only 5/109 (4.6%) in addition

**B.** Children <5 years: incremental yield of adding one Ultra on NPA, followed by one Ultra and a subsequent culture on sputum and/or gastric lavage for children <5 years if microbiologically confirmed (n=60). Among young children (<5 years), 19/60 (31.7%) tested positive by MTB-HR, with an additional 3/60 (5.0%) identified by one positive Ultra on NPA alone, 20/60 (33.3%) by a positive Ultra on a respiratory sample (sputum/GL) alone, and 27/60 (45.0%) by a positive Ultra on a respiratory sample and/or NPA. The additional yield of a TB culture in addition to Ultra was low (n=1, 1.7%).

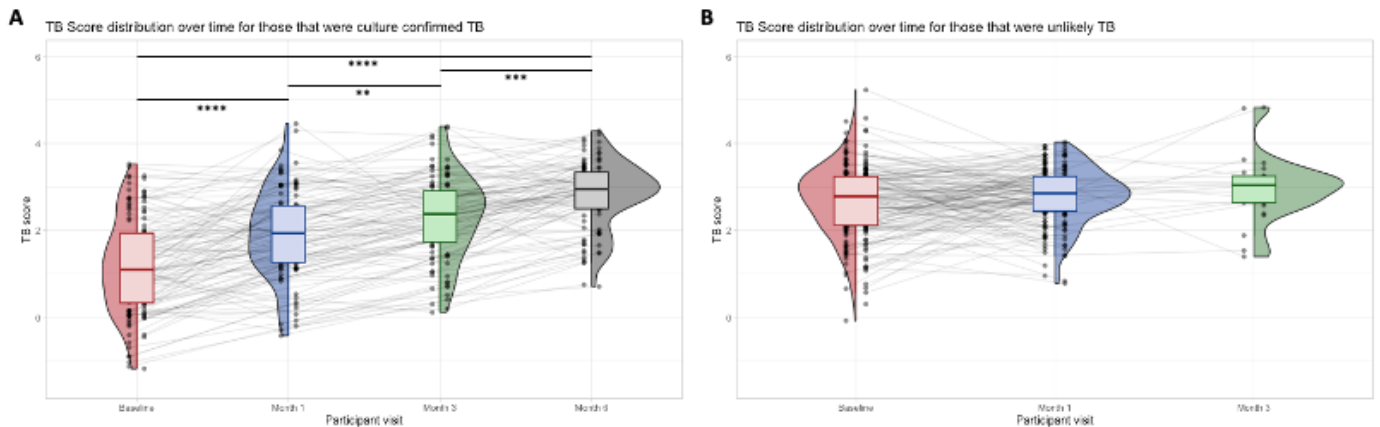

**Supplemental Figure 9: MTB-HR TB score over time in children with confirmed TB started on TB treatment (A) and children with unlikely TB (B).**

Rain Cloud plots show the distribution and the box the interquartile range (IQR) along with the median. The points are individual data points and connected over time showing the trends. Bars with asterisks (\*) represent the results of the pairwise paired t-tests conducted between visits.  $p < 0.05$  \*,  $p < 0.01$  \*\*,  $p < 0.001$  \*\*\*,  $p < 0.0001$  \*\*\*\*.

**Supplemental Table 6: MTB-HR as a treatment response marker: clinical characteristics of children who converted from TB positive (MTB-HR TB score < 1.5) to non-TB (MTB-HR TB score ≥ 1.5) at each time point.**

Total: children who were TB positive at the baseline visit (n=76). The numbers reflect the numbers of children who converted within the subgroup and time point and the denominator for the proportion is n=76. Those where n of subcategories is missing are missing datapoints and excluded from analysis.

| Subgroups           | n  | All (%)    | 1 month (%) | 3 months (%) | 6 months (%) |
|---------------------|----|------------|-------------|--------------|--------------|
| All                 | 76 | 59 (77.6)  | 32 (42.1)   | 13 (17.1)    | 14 (18.4)    |
| Age (categorised)   |    |            |             |              |              |
| < 1                 | 8  | 7 (87.5)   | 6 (75.0)    | 1 (12.5)     | 0 (0.0)      |
| 1 – 5               | 19 | 17 (89.5)  | 9 (47.4)    | 2 (10.5)     | 6 (66.7)     |
| 5 – 10              | 14 | 10 (71.4)  | 7 (50.0)    | 2 (14.3)     | 1 (7.1)      |
| 10 – 15             | 35 | 25 (71.4)  | 10 (28.6)   | 8 (22.9)     | 7 (20.0)     |
| HIV status          |    |            |             |              |              |
| Negative            | 62 | 50 (80.6)  | 27 (43.5)   | 12 (19.4)    | 11 (17.7)    |
| Positive            | 4  | 0 (0.0)    | 0 (0.0)     | 0 (0.0)      | 0 (0.0)      |
| Malnutrition        |    |            |             |              |              |
| None                | 46 | 37 (80.4)  | 20 (43.5)   | 9 (19.6)     | 8 (17.4)     |
| Mild/moderate       | 13 | 11 (84.6)  | 4 (30.8)    | 2 (15.4)     | 5 (38.5)     |
| Severe              | 12 | 7 (58.3)   | 5 (41.7)    | 1 (8.3)      | 1 (8.3)      |
| Site                |    |            |             |              |              |
| UCTLI               | 35 | 30 (85.7)  | 17 (48.6)   | 7 (20.0)     | 6 (17.1)     |
| MMRC                | 14 | 14 (100.0) | 10 (71.4)   | 3 (21.4)     | 1 (7.1)      |
| INS                 | 7  | 5 (71.4)   | 1 (14.3)    | 1 (14.3)     | 3 (42.9)     |
| CoM                 | 1  | 1 (100.0)  | 0 (0.0)     | 0 (0.0)      | 1 (100.0)    |
| CMC                 | 18 | 9 (50.0)   | 4 (22.2)    | 2 (11.1)     | 3 (16.7)     |
| TB disease severity |    |            |             |              |              |
| Non severe TB       | 10 | 10 (100.0) | 8 (80.0)    | 1 (10.0)     | 1 (10.0)     |
| Severe TB           | 66 | 48 (72.7)  | 23 (34.8)   | 12 (18.2)    | 13 (19.7)    |

**References**

1. Olbrich L, Nliwasa M, Sabi I, et al. Rapid and Accurate Diagnosis of Pediatric Tuberculosis Disease (RaPaed-TB): A Diagnostic Accuracy Study for Pediatric Tuberculosis. *The Pediatric Infectious Disease Journal* 2023; e003853.
